# Supplementary material for: Characterization of Individualized Glycemic Excursions during a Standardized Bout of Hypoglycemia-Inducing Exercise and Subsequent Hypoglycemia Treatment—A Pilot Study
Source: MDPI journal article supplement (doi:10.3390/nu13114165), 2021-11-21

# 1 Table S1 Participants' clinical characteristics

Supplemental Table S1 Patients' clinical characteristics

| Subject | Age (years) | DM duration (years) | BMI  | HbA1c (mmol/mol) | Individual target heart rate (beats/min) |
|---------|-------------|---------------------|------|------------------|------------------------------------------|
| 1       | 45          | 8                   | 24.6 | 58               | 125                                      |
| 2       | 40          | 7                   | 24.3 | 53               | 130                                      |
| 3       | 36          | 9                   | 22.5 | 62               | 137                                      |
| 4       | 35          | 9                   | 22.7 | 51               | 120                                      |
| 5       | 38          | 5                   | 24.1 | 60               | 124                                      |
| 6       | 40          | 7                   | 22.1 | 61               | 127                                      |
| 7       | 39          | 8                   | 22.8 | 56               | 124                                      |
| 8       | 38          | 6                   | 23.6 | 49               | 132                                      |
| 9       | 42          | 11                  | 23.4 | 63               | 126                                      |
| 10      | 31          | 7                   | 23.9 | 57               | 127                                      |

## 2 Figures S1: Spline fits of individual patients

Units: Axis x: hours:minutes; Axis y: mmol/l

### 2.1 Patient 1

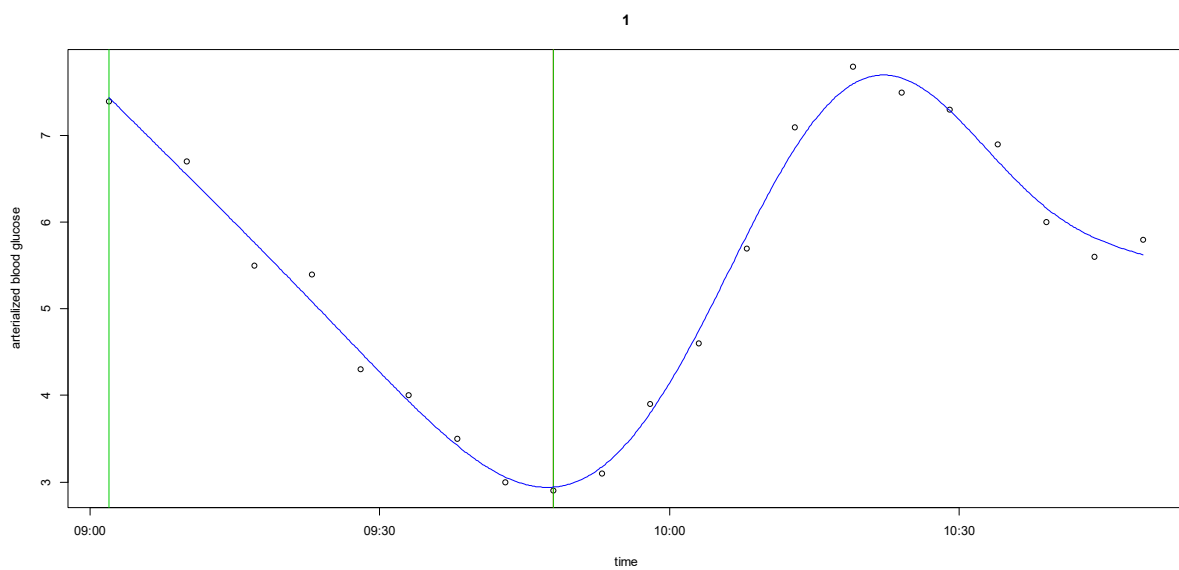

2.2 Patient 2

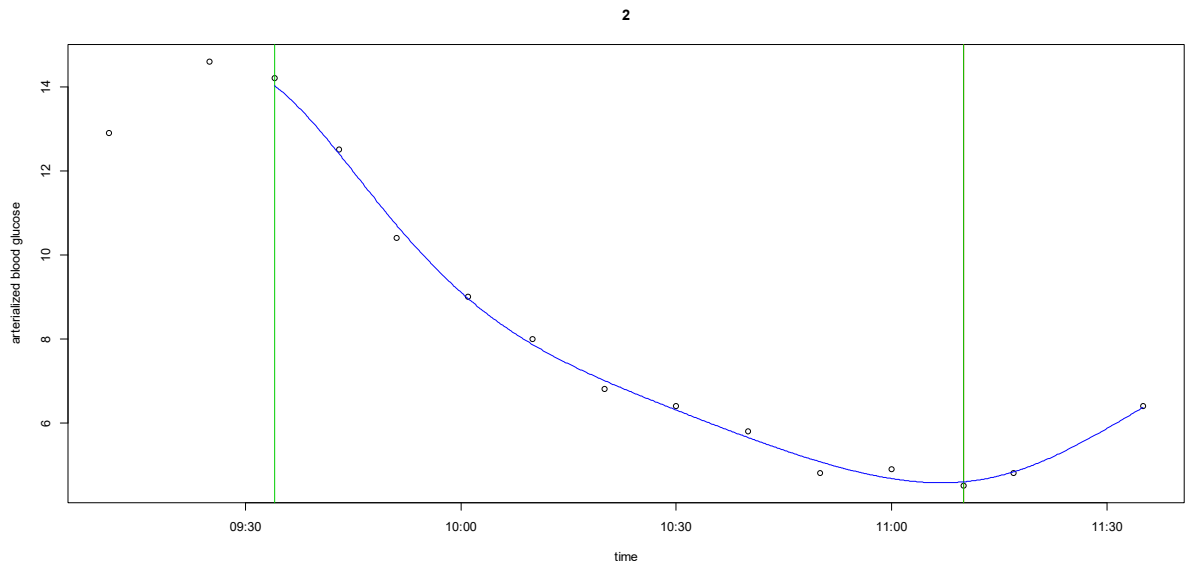

2.3 Patient 3

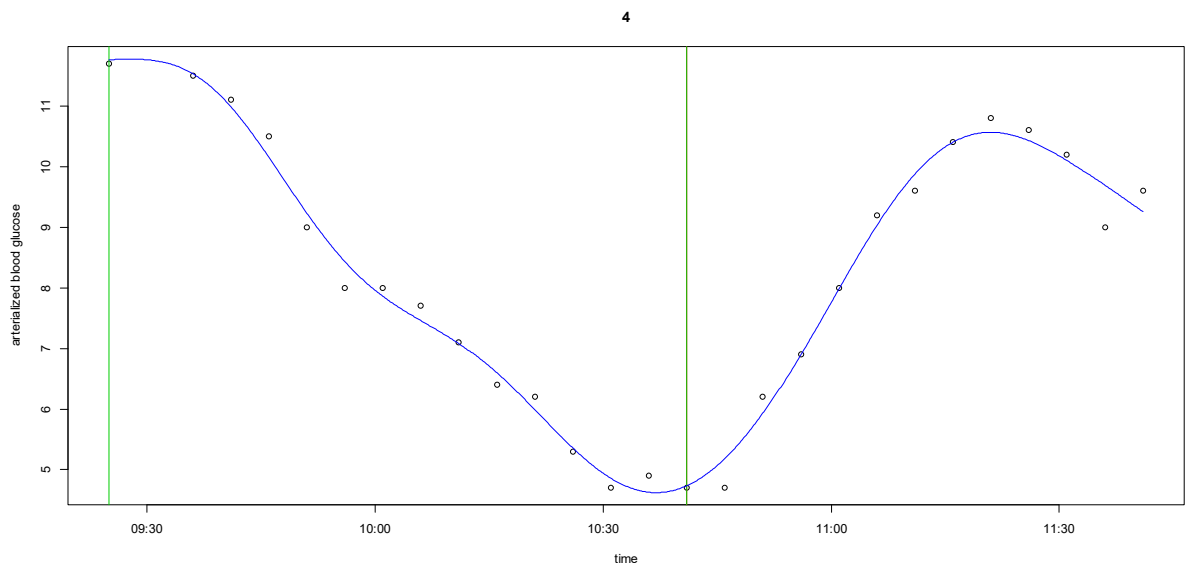

## 2.4 Patient 4

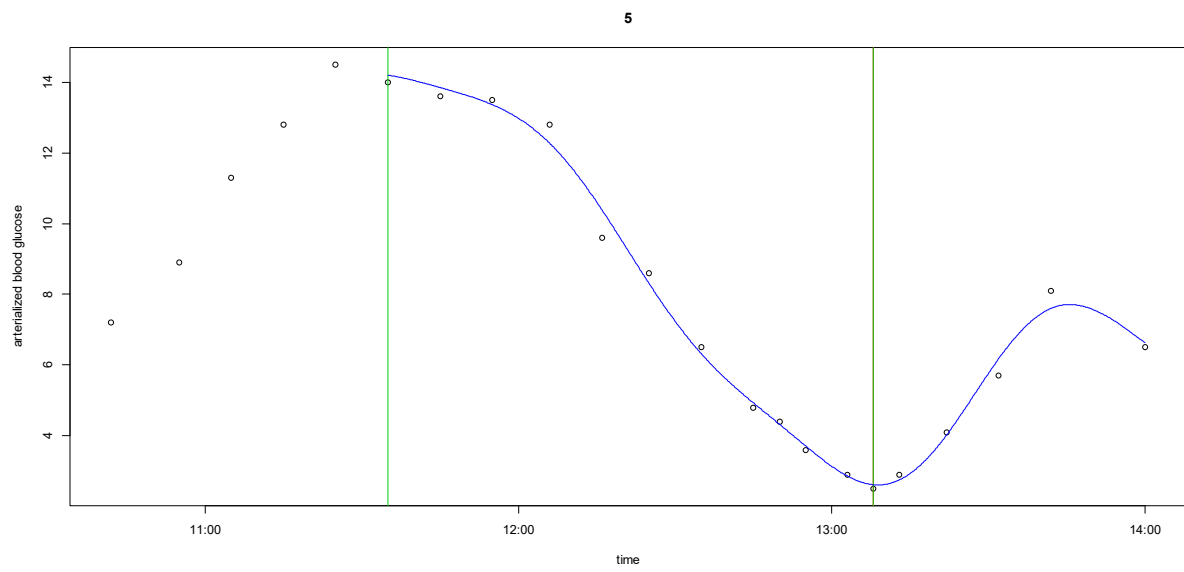

## 2.5 Patient 5

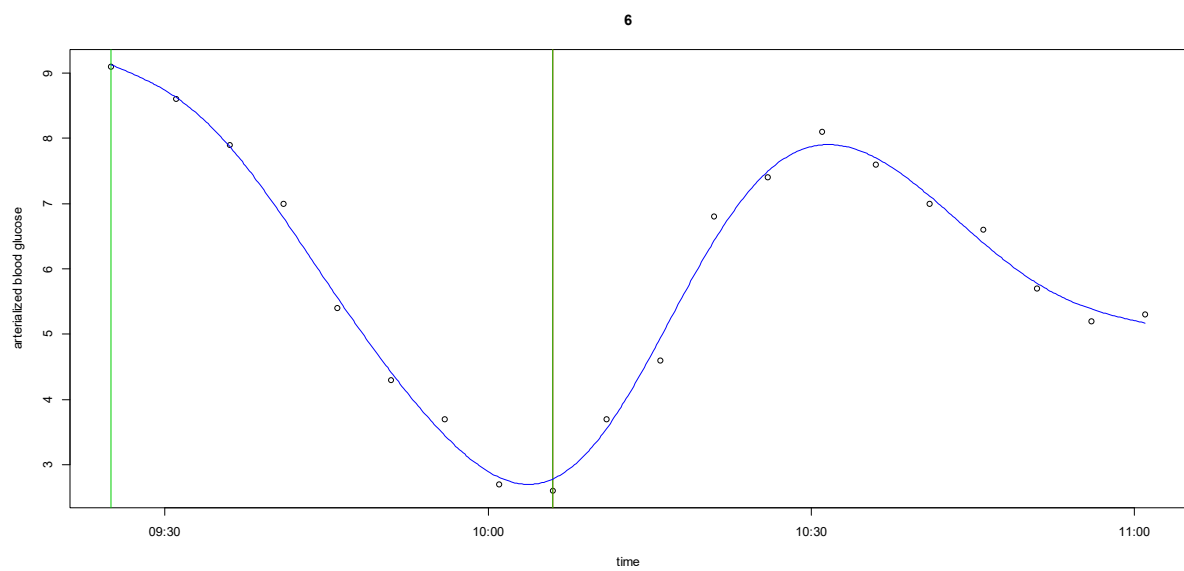

2.6 Patient 6

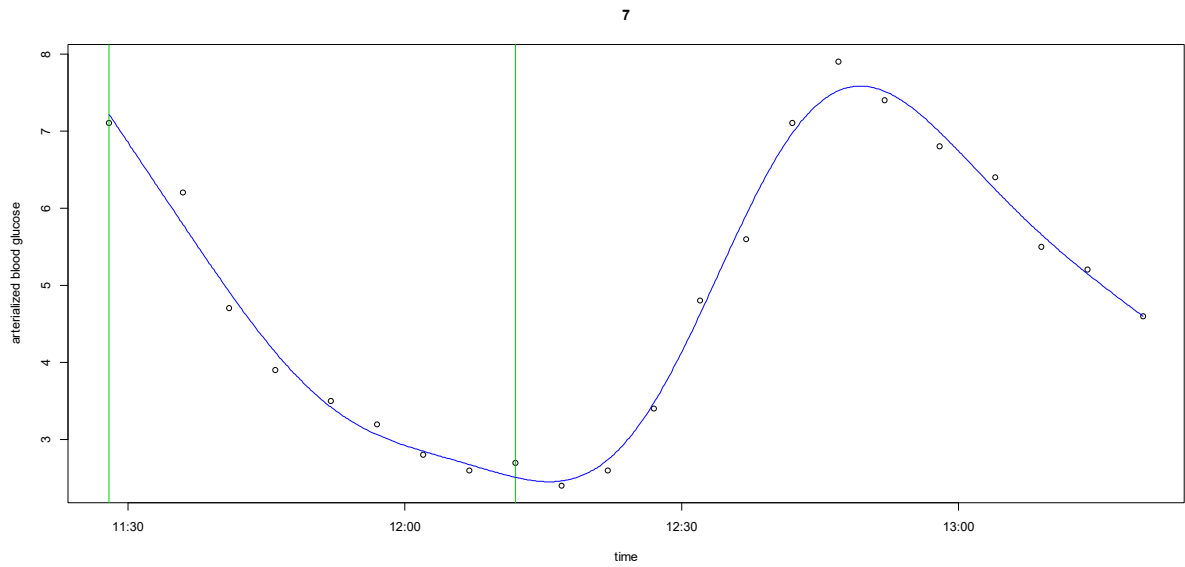

2.7 Patient 7

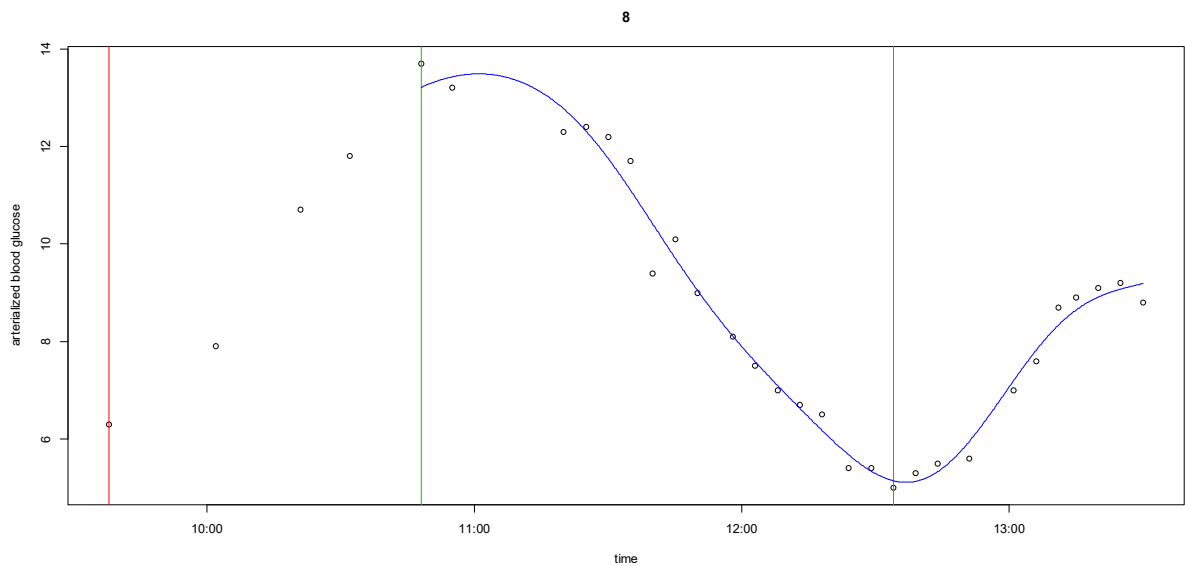

2.8 Patient 8

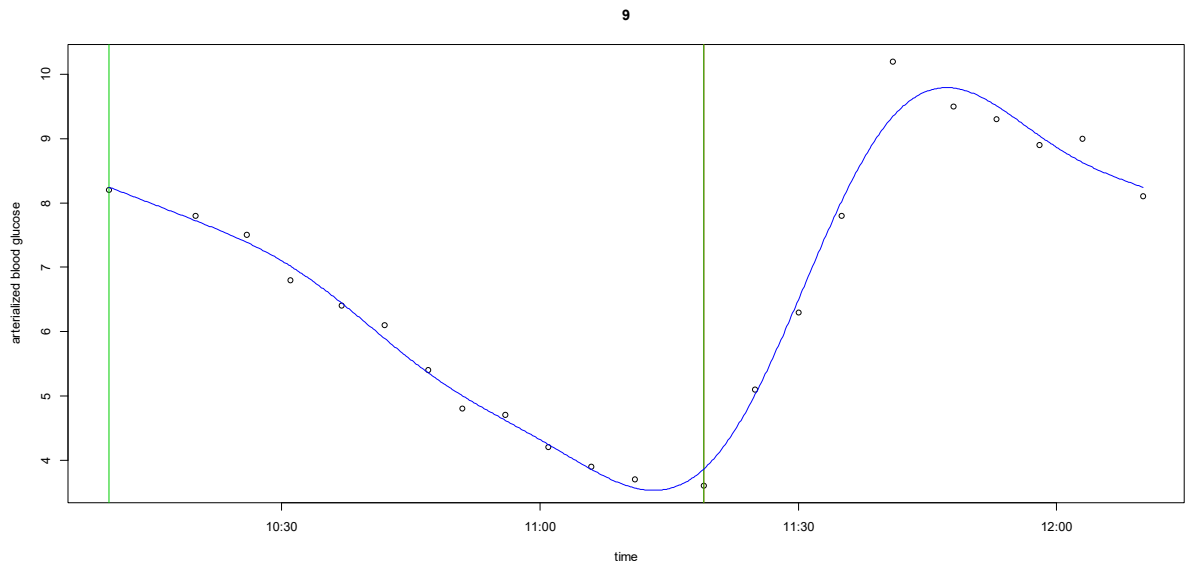

2.9 Patient 9

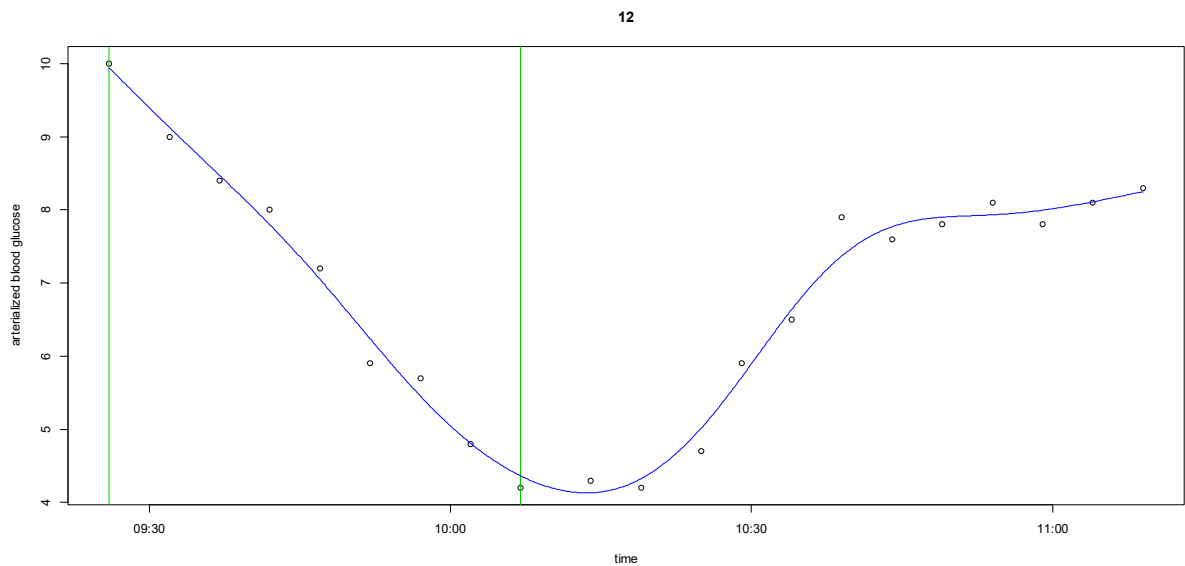

## 2.10 Patient 10

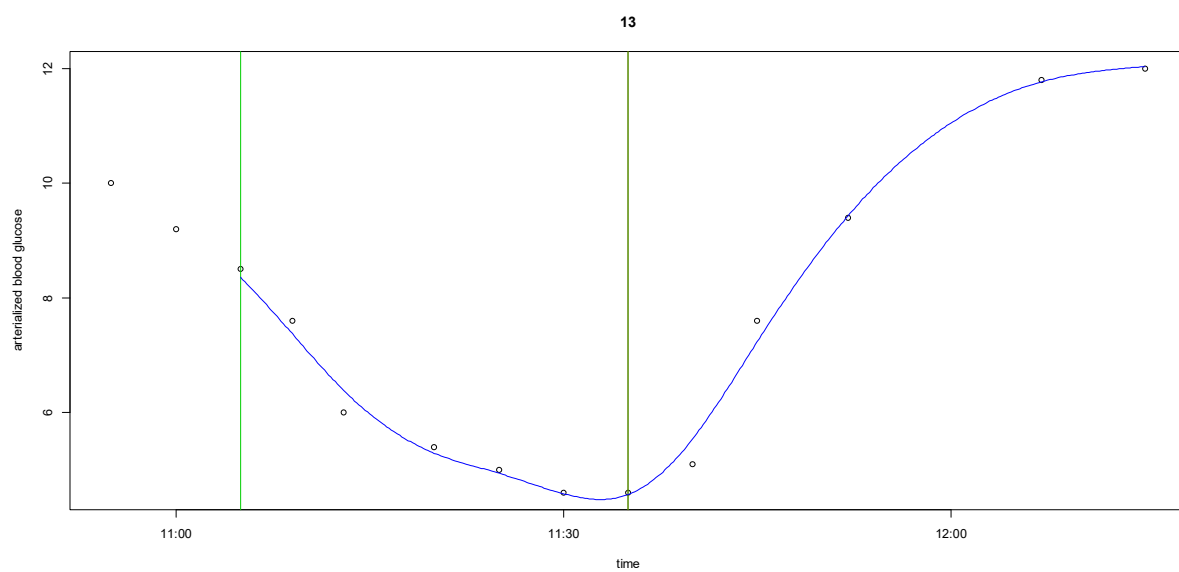

Supplement: s1 [file s1]
